# Supplementary material for: CuxS nanoparticle@carbon nanorod composites prepared from metal–organic frameworks as efficient electrode catalysts for quantum dot sensitized solar cells
Source: Royal Society of Chemistry journal article supplement (doi:10.1039/c8ta10629k), 2018-12-24
Supplement: c8ta10629k1.pdf [file c8ta10629k1.pdf]

**Electronic Supplementary Information (ESI)**

**Cu<sub>x</sub>S nanoparticle@carbon nanorod composites prepared from metal-organic framework as efficient electrode catalysts in quantum dot sensitized solar cells**

**Yuan Wang<sup>†a</sup>, Mingshui Yao<sup>†b</sup>, Lianjing Zhao<sup>a</sup>, Wei Wang<sup>a</sup>, Weinan Xue<sup>a</sup>, Yan Li<sup>\*a</sup>**

<sup>a</sup>Key Laboratory for Advanced Materials, Shanghai Key Laboratory of Functional Materials Chemistry, School of Chemistry and Molecular Engineering, East China University of Science and Technology, Shanghai 200237, China

<sup>b</sup>State Key Laboratory of Structural Chemistry, Fujian Institute of Research on the Structure of Matter, Chinese Academy of Sciences(CAS), Fuzhou, Fujian, 350002 P. R. China

<sup>†</sup>These authors contributed equally to this work

\*E-mails: [yli@ecust.edu.cn](mailto:yli@ecust.edu.cn)

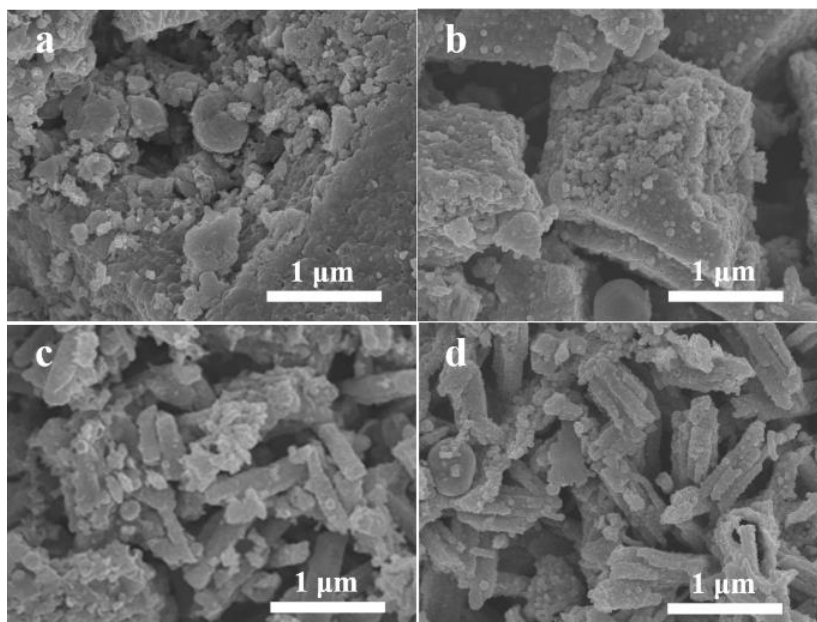

**Fig. S1** SEM images of internal of (a) Cu@C-800, (b) Cu@C-900, (c) Cu@C-1000, (d) Cu@C-1100.

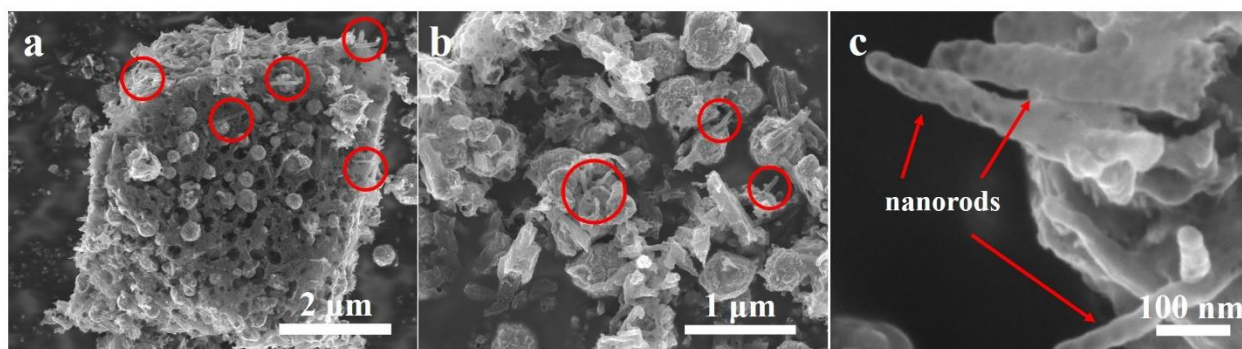

**Fig. S2** SEM images of (a) octahedral geometry and (b) internal of Cu@C-950 (inside red circles are half-baked carbon nanorods). (c) Enlarged view of nanorods on the surface of Cu@C-950.

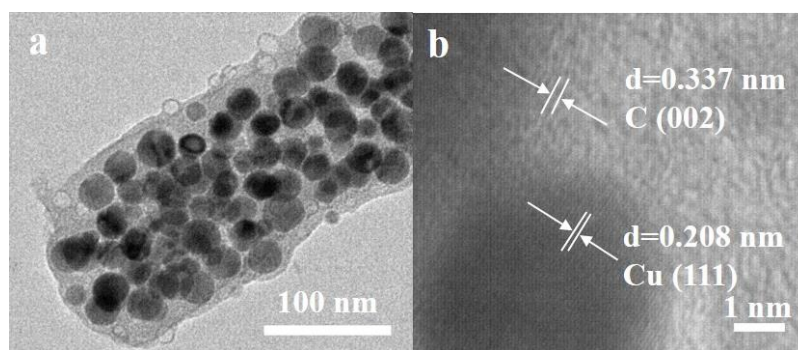

**Fig. S3** TEM images of (a) Cu@C-1100, (b) High-resolution TEM of Cu@C-1100 with Cu nanoparticles encased in the graphitic carbon (insert: lattice fringes of the crystalline Cu NPs of Cu@C-1100).

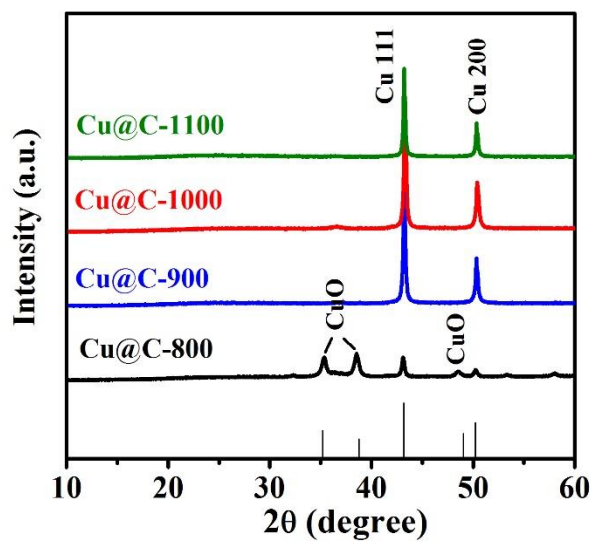

**Fig. S4** Powder XRD patterns of Cu@C-x (Cubic Cu: 00-001-1241, Cubic CuO: 00-002-1041)

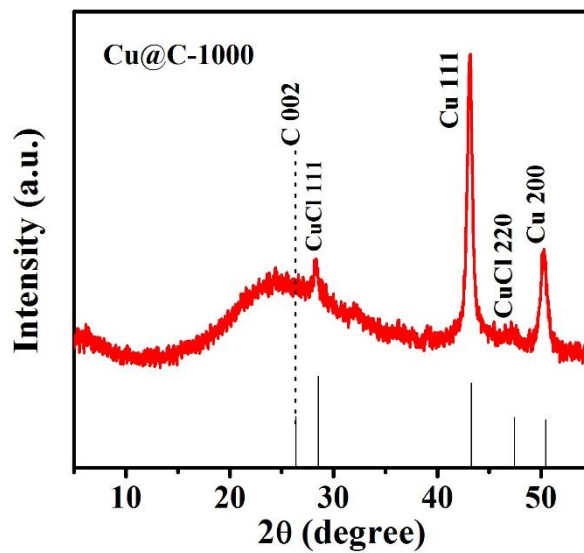

**Fig. S5** Powder XRD patterns of the Cu@C-1000 sample treated by aqua regia (C: 41-1487, CuCl: 06-0344).

The presence of CuCl diffraction peaks at  $2\theta = 28.5^\circ$  and  $47.4^\circ$  are attributed to the chemical reaction between aqua regia and Cu NPs.

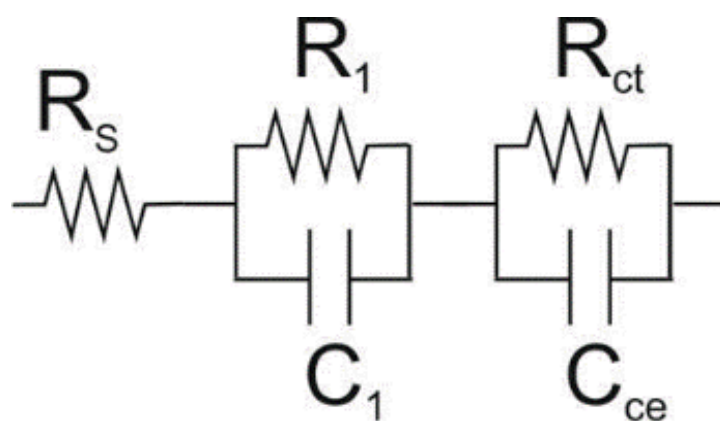

**Fig. S6** Simulation circuit used for analysing the EIS data for symmetric dummy cells.  $R_s$  accounts for substrate resistance,  $R_1$  and  $C_1$ , associated to high frequency arc, for charge transfer resistance and contact capacitance at interface between substrate and carbon electrode,  $R_{ct}$  and  $C_{ce}$ , associated to low frequency arc, for charge transfer resistance and electrode capacitance at CE/electrolyte interface.

**Table S1** Parameters from EIS measurements of different CEs.

| Electrodes        | $R_s$ ( $\Omega \text{ cm}^2$ ) | $2R_1$ ( $\Omega \text{ cm}^2$ ) | $2C_1$ (mF/cm <sup>2</sup> ) | $2R_{ct}$ ( $\Omega \text{ cm}^2$ ) | $2C_{ce}$ (F/cm <sup>2</sup> ) |
|-------------------|---------------------------------|----------------------------------|------------------------------|-------------------------------------|--------------------------------|
| Cu@C-800          | 8.257                           | 0.864                            | 24.358                       | 1.478                               | 0.264                          |
| Cu@C-900          | 8.325                           | 0.660                            | 14.362                       | 1.382                               | 0.373                          |
| Cu@C-1000         | 8.280                           | 0.325                            | 0.026                        | 0.353                               | 0.069                          |
| Cu@C-1100         | 8.295                           | 0.244                            | 0.503                        | 0.702                               | 0.058                          |
| Cu <sub>2</sub> S | 8.456                           | 0.583                            | 3.592                        | 1.328                               | 0.288                          |



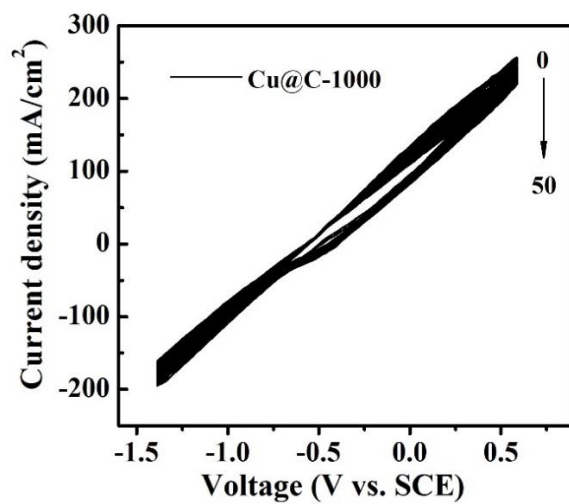

**Fig. S7** Consecutive CV measurement for 50 cycles about Cu@C-1000/FTO CEs at a scan rate of  $100 \text{ mV} \cdot \text{s}^{-1}$  in the media of  $\text{Sn}^{2-}/\text{S}^{2-}$  redox electrolyte.

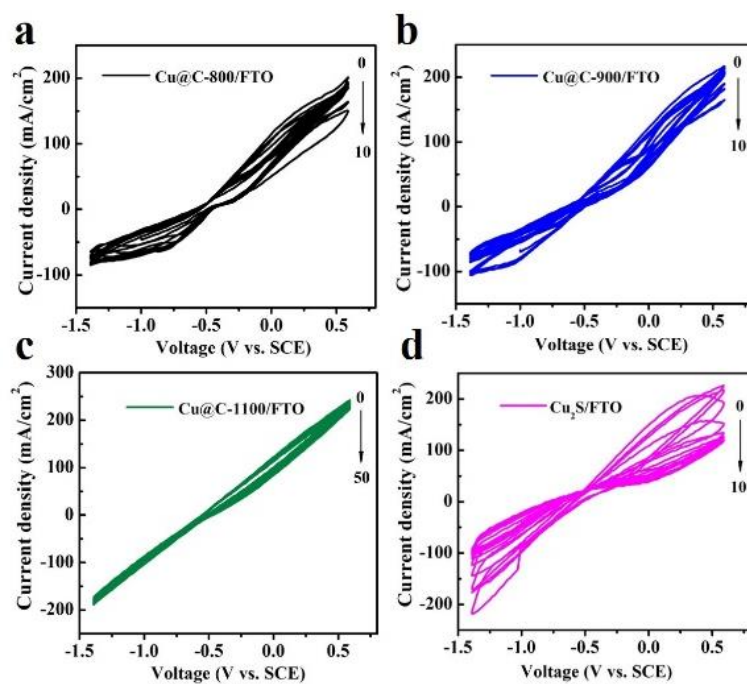

**Fig. S8** Electrochemical stability of different CEs. Consecutive CV measurement for 10 cycles of (a) Cu@C-800/FTO, (b) Cu@C-900/FTO, 50 cycles of (c) Cu@C-1100/FTO, and 10 cycles of (d) Cu<sub>2</sub>S/FTO, and at a scan rate of  $100 \text{ mV}\cdot\text{s}^{-1}$  in the media of  $\text{Sn}^{2+}/\text{S}^{2-}$  redox electrolyte, respectively.

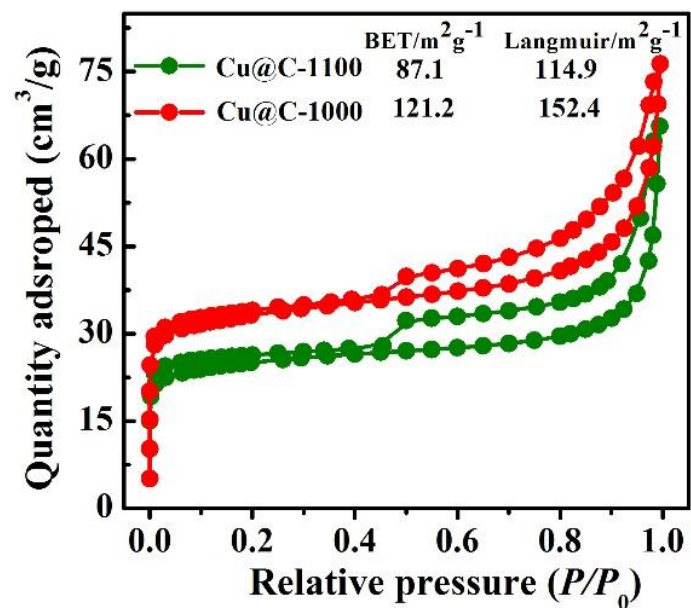

**Fig. S9** Nitrogen adsorption isotherms measured at 77 K of Cu@C-1000 and Cu@C-1100 (insert: pore parameters of Cu@C-1000 and Cu@C-1100).

**Table S2** Pore parameters of Cu@C-*x* samples.

| Samples  | S <sub>BET</sub> (m <sup>2</sup> /g) |
|----------|--------------------------------------|
| Cu@C-800 | 130.88                               |
| Cu@C-800 | 114.85                               |
| Cu@C-800 | 99.59                                |
| Cu@C-800 | 121.69                               |
| Cu@C-800 | 87.13                                |

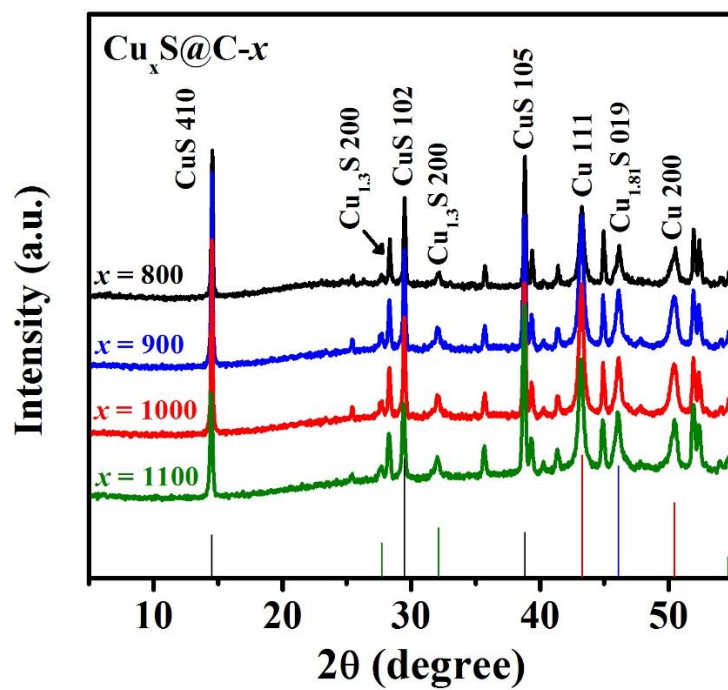

**Fig. S10** Powder XRD patterns of obtained  $\text{Cu}_x\text{S}@C-x$ . (JCPDS information: red line is cubic Cu 04-0836, green line is Cubic  $\text{Cu}_{1.3}\text{S}$  24-0061, blue line is cubic  $\text{Cu}_{1.81}\text{S}$  41-0959, black line is cubic CuS 06-0464).

**Table S3** Inductively coupled plasma atomic emission spectrometry (ICP-AES) results for Cu contents in the aqueous solution soaked by  $\text{Cu}_x\text{S}@C-x$  samples.

| Samples                                 | Cu (mg/L) |
|-----------------------------------------|-----------|
| $\text{Cu}_x\text{S}@C-800/\text{FTO}$  | 2.77      |
| $\text{Cu}_x\text{S}@C-900/\text{FTO}$  | 2.58      |
| $\text{Cu}_x\text{S}@C-1000/\text{FTO}$ | 0.74      |
| $\text{Cu}_x\text{S}@C-1100/\text{FTO}$ | 0.72      |
| $\text{Cu}_2\text{S}/\text{FTO}$        | 1.10      |
